# Supplementary material for: Protein tyrosine phosphatase PTPN22 is dispensable for dendritic cell antigen processing and promotion of T-cell activation by dendritic cells
Source: PubMed Central journal article supplement (PMC5645108; doi:10.1371/journal.pone.0186625), 2017-10-17

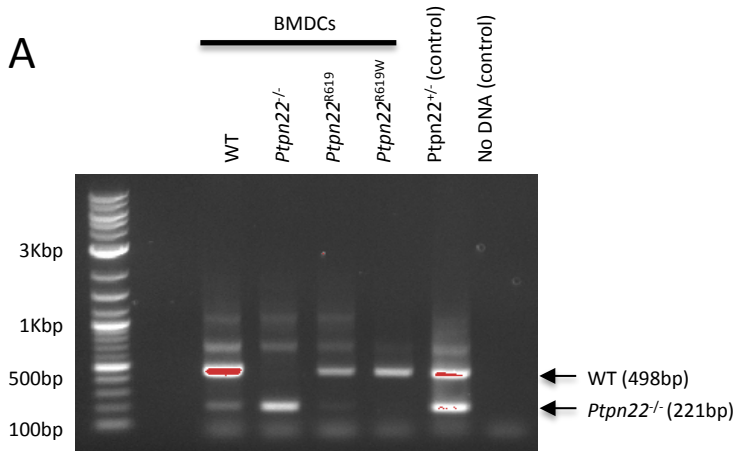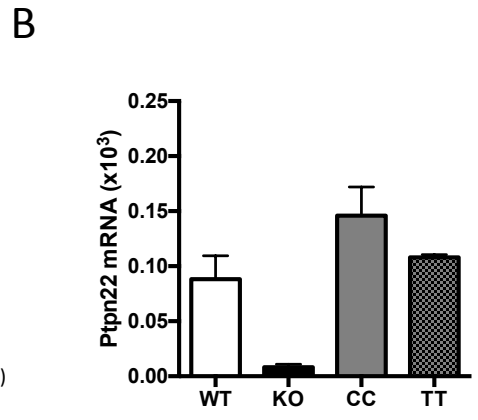

Supplement: pone.0186625.s001.pdf [file pone.0186625.s001.pdf]
